# Supplementary material for: Phenotypic Characteristics and Occurrence Basis of Leaf Necrotic Spots in Response of Weedy Rice to Imazethapyr
Source: MDPI journal article supplement (doi:10.3390/plants13091218), 2024-04-28
Supplement: s1 [file s1]

## Supplementary Tables

Table S1 Response type of weedy rice population to imazethapyr

| Germplasm name       | Country            | First week | Second week |
|----------------------|--------------------|------------|-------------|
| China lu             | China              | 0          | 3           |
| Jainaengmi 2         | South Korea        | 2          | 1           |
| Maejeonaengmi 6      | South Korea        | 0          | 3           |
| Anhui red rice 85-22 | China              | 0          | 0           |
| Anhui red rice 85-23 | China              | 2          | 1           |
| W1713                | Brazil             | 0          | 1           |
| BT6c                 | Bhutan             | 0          | 1           |
| Namweonaengmi 2      | South Korea        | 0          | 2           |
| Burma47              | Laos               | 0          | 1           |
| Losanos 7            | South Korea        | 0          | 1           |
| Pangasinan 1         | South Korea        | 0          | 3           |
| Dancheon 1           | South Korea        | 2          | 1           |
| Geumtap              | South Korea        | 2          | 3           |
| Seongju 8            | South Korea        | 0          | 3           |
| Small seed           | South Korea        | 0          | 0           |
| Big seed             | South Korea        | 0          | 1           |
| Bynamanar-w3         | Myanmar            | 0          | 0           |
| K31                  | South Korea        | 2          | 3           |
| 07-76                | China heilongjiang | 2          | 3           |
| 07-78                | China heilongjiang | 0          | 1           |
| 07-90                | China heilongjiang | 0          | 1           |
| LZ85                 | China jili         | 0          | 1           |
| LZ87                 | China jili         | 0          | 1           |
| LZ53                 | China laoning      | 0          | 1           |
| LZ51                 | China laoning      | 0          | 3           |
| SZ3                  | China jiangsu      | 0          | 0           |
| SZ11                 | China jiangsu      | 2          | 1           |
| SZ12                 | China jiangsu      | 0          | 3           |
| SZ15                 | China jiangsu      | 0          | 1           |
| SZ43                 | China jiangsu      | 2          | 1           |
| YZ3                  | China guangdong    | 0          | 3           |
| YZ14                 | China guangdong    | 0          | 1           |
| 0001F                | China hainan       | 0          | 2           |
| GX                   | China guangxi      | 2          | 2           |
| Cheongdoaengmi 1     | South Korea        | 0          | 3           |
| Gyeongjuaengmi 1     | South Korea        | 0          | 3           |
| Uljuaengmi 1         | South Korea        | 0          | 3           |
| Gwangyangaengmi 1    | South Korea        | 0          | 3           |
| Suncheonaengmi 1     | South Korea        | 0          | 3           |
| Gwangsanaengmi 1     | South Korea        | 3          | 3           |
| Chinglepet 5         | Indian             | 2          | 3           |
| Kanyakumari 29       | Indian             | 0          | 1           |
| Kanyakumari 5        | Indian             | 0          | 3           |
| Kayathae 29          | Indian             | 0          | 3           |
| Maduras 10           | Indian             | 0          | 1           |
| Tanjore 14           | Indian             | 0          | 3           |

|            |             |   |   |
|------------|-------------|---|---|
| vietnam30  | Vietnam     | 0 | 3 |
| vietnam46  | Vietnam     | 1 | 1 |
| vietnam53  | Vietnam     | 0 | 3 |
| vietnam92  | Vietnam     | 0 | 1 |
| vietnam147 | Vietnam     | 0 | 3 |
| vietnam157 | Vietnam     | 0 | 1 |
| vietnam193 | Vietnam     | 0 | 1 |
| Cambodia19 | Cambodia    | 0 | 1 |
| Cambodia31 | Cambodia    | 0 | 3 |
| Cambodia37 | Cambodia    | 0 | 3 |
| Cambodia42 | Cambodia    | 0 | 3 |
| Talac 19   | Philippines | 0 | 1 |
| Nepal 27   | Nepal       | 1 | 1 |
| Burma47    | Laos        | 0 | 3 |
| Nepal E9   | Nepal       | 0 | 3 |
| C9575      | Japan       | 0 | 3 |
| C9576      | Japan       | 0 | 3 |
| W1713      | Brazil      | 0 | 1 |
| W1714      | Brazil      | 2 | 1 |
| US1        | USA         | 2 | 3 |
| US2        | USA         | 1 | 3 |
| Ch79-1     | China       | 0 | 3 |
| Ch80-2     | China       | 0 | 2 |
| heidiaogu  | China       | 2 | 1 |
| 85-27      | China       | 2 | 0 |
| TKN7-3     | Nepal       | 0 | 3 |
| BT6c       | Bhutan      | 0 | 1 |
| WR-01      | Sri Lanka   | 0 | 3 |
| WR-02      | Sri Lanka   | 0 | 3 |
| WR-03      | Sri Lanka   | 0 | 3 |
| WR-04      | Sri Lanka   | 2 | 1 |
| Lao1       | Sri Lanka   | 0 | 1 |
| Za2-2      | Sri Lanka   | 2 | 0 |
| Za2-3      | Sri Lanka   | 0 | 3 |
| Za2-4      | Sri Lanka   | 0 | 3 |
| Za2-5      | Sri Lanka   | 0 | 1 |
| Za2-6      | Sri Lanka   | 2 | 1 |
| Za2-7      | Sri Lanka   | 2 | 1 |
| Za4        | Sri Lanka   | 2 | 3 |
| Za4-1      | Sri Lanka   | 0 | 1 |
| Za4-2      | Sri Lanka   | 0 | 1 |
| Za4-3      | Sri Lanka   | 1 | 0 |
| Za4-4      | Sri Lanka   | 0 | 1 |
| Za4-5      | Sri Lanka   | 0 | 3 |
| Za4-6      | Sri Lanka   | 1 | 3 |
| Za4-7      | Sri Lanka   | 0 | 3 |
| Za5-1      | Sri Lanka   | 3 | 1 |
| Za5-2      | Sri Lanka   | 3 | 3 |
| Za6-1      | Sri Lanka   | 3 | 3 |
| Za7-1      | Sri Lanka   | 0 | 1 |

|                       |             |   |   |
|-----------------------|-------------|---|---|
| Ssalsshre-2           | South Korea | 0 | 1 |
| Ch80-2                | China       | 0 | 1 |
| Tatkone-3             | Myanmar     | 3 | 1 |
| Myittha-4             | Myanmar     | 1 | 3 |
| Htantepm-w1           | Myanmar     | 0 | 2 |
| Htantepm-w2           | Myanmar     | 0 | 3 |
| Htanmaner-w1          | Myanmar     | 2 | 1 |
| Nyaunglaybyin-w1      | Myanmar     | 2 | 3 |
| Nyaunglaybyin-2       | Myanmar     | 2 | 3 |
| Htantepin-14          | Myanmar     | 2 | 1 |
| Htantepin-13          | Myanmar     | 0 | 1 |
| Htantepin-6           | Myanmar     | 0 | 3 |
| China black shatter-1 | China       | 0 | 1 |
| China black shatter-2 | China       | 0 | 1 |
| Bg871                 | Sri Lanka   | 0 | 3 |
| Bg364                 | Sri Lanka   | 2 | 1 |
| Sanno                 | South Korea | 2 | 3 |

Note: 0 means weedy rice keep green; 1 lose green and leaf tip with little withered; 2 placing necrosis spot; 3 mixed with 1 and 2, 2 become to 1 because of withered part and necrosis part merged together. There were necrotic spot type germplasm materials in most areas, which indicated that necrotic spot type did not have regional specificity (related content at section 2.1)

Table S2 Correlation of indicators with herbicide concentration and time

| Correlation coefficient | Fv/Fm | Fv'/Fm' | Y <sub>NO</sub> | Y <sub>NPQ</sub> | Chldx | Leaf area |
|-------------------------|-------|---------|-----------------|------------------|-------|-----------|
| R                       | 0.717 | 0.672   | 0.683           | 0.344            | 0.687 | 0.672     |

Note: the correlation of Fv/Fm and treatment concentration is the strongest competes with other fluorescence index (related content at section 2.2.2)

Table S3 GESA enrichment analysis of necrotic materials between IMI and CK

| KEGG Pathway Term Desc                                | Original size | ES   | NES  | RANK AT MAX |
|-------------------------------------------------------|---------------|------|------|-------------|
| Protein processing in endoplasmic reticulum           | 374           | 0.51 | 2.11 | 8777        |
| Phagosome                                             | 136           | 0.51 | 1.93 | 9167        |
| Proteasome                                            | 88            | 0.54 | 1.92 | 8839        |
| SNARE interactions in vesicular transport             | 51            | 0.55 | 1.79 | 10087       |
| Biosynthesis of nucleotide sugars                     | 142           | 0.46 | 1.76 | 5639        |
| Endocytosis                                           | 330           | 0.42 | 1.74 | 9237        |
| Butanoate metabolism                                  | 41            | 0.56 | 1.74 | 6996        |
| Cutin, suberine and wax biosynthesis                  | 88            | 0.49 | 1.68 | 6553        |
| Flavonoid biosynthesis                                | 140           | 0.44 | 1.68 | 7706        |
| Valine, leucine and isoleucine degradation            | 97            | 0.44 | 1.62 | 8808        |
| Stilbenoid, diarylheptanoid and gingerol biosynthesis | 87            | 0.50 | 1.61 | 6430        |

|                                             |     |      |      |      |
|---------------------------------------------|-----|------|------|------|
| Amino sugar and nucleotide sugar metabolism | 452 | 0.38 | 1.60 | 7375 |
|---------------------------------------------|-----|------|------|------|

Note: According to the sorting of gene sets, the first several were related to membrane activity, indicating that the intracellular lipid activity became active and chaotic after the treatment of imazethapyr, and the programmed death pathway began to respond. (contented in section 2.3)

Table S4 Sequences of the qPCR primers

| Gene symbols      | Locus ID     | Primer sequences                                   |
|-------------------|--------------|----------------------------------------------------|
| Actin             | None         | F-CAGCCACACTGTCCCCATCTA<br>R-AGCAAGGTCGAGACGAAGGA  |
| <i>OsHsp16.9A</i> | Os01g0136100 | F-CCAAGGTGGACCAGGTGAAG<br>R-ACCGATCACATCTTCAGGAGC  |
| <i>OsHsp16.9B</i> | Os01g0136200 | F-CCAAGGTGGACCAGGTGAAG<br>R-CCGAGTGAAACACCGCAAAC   |
| <i>OsHsp18.0</i>  | Os01g0184100 | F-GGCAAGTTCATGCGCAAGTT<br>R-GGAATCTCATCACGCGACCT   |
| <i>OsCab2R</i>    | Os01g0600900 | F-CGTCTCTGCAGGAGAGTGTG<br>R-ACTCGTACATCCATCCACGC   |
| <i>OsEFA27</i>    | Os04g0511200 | F-GCATGTGGCTTTCTTCGACC<br>R-TGACCGGCATAAACCTTCCC   |
| <i>OsDER1</i>     | Os05g0187800 | F-CAGAATAGGTGTGCAGGCGA<br>R-TTGCATCTCCCAGATAGGCG   |
| <i>OsAGPL3</i>    | Os05g0580000 | F-GGAAGACGGATGATCGAGAAAG<br>R-CACATGAGATGCACCAACGA |
| <i>OsHsfB2c</i>   | Os09g0526600 | F-TGCCCCCTCCCCTACACTATT<br>R-AGGCAGACGGATTACAAGGC  |

Note: the transcriptome validation (related content at section 2.3)

Table S5 Variance analysis of the Fv/Fm with intense light and high temperature

| Source        | Sum of squares | DF | Mean square | F value  | Pr>F  |
|---------------|----------------|----|-------------|----------|-------|
| Model         | 0.034a         | 3  | 0.011       | 11.826   | 0.001 |
| Intercept     | 5.327          | 1  | 5.327       | 5634.409 | 0.000 |
| Temperature   | 0.017          | 1  | 0.017       | 17.602   | 0.001 |
| Light         | 0.13           | 1  | 0.13        | 13.628   | 0.003 |
| Tm*light      | 0.004          | 1  | 0.004       | 4.607    | 0.053 |
| Error         | 0.11           | 12 | 0.001       |          |       |
| Total         | 5.372          | 16 |             |          |       |
| Revised total | 0.045          | 15 |             |          |       |

Note: R<sup>2</sup>=0.747, revised R<sup>2</sup>=0.684 (related content at section 2.5)

## Supplementary Figures



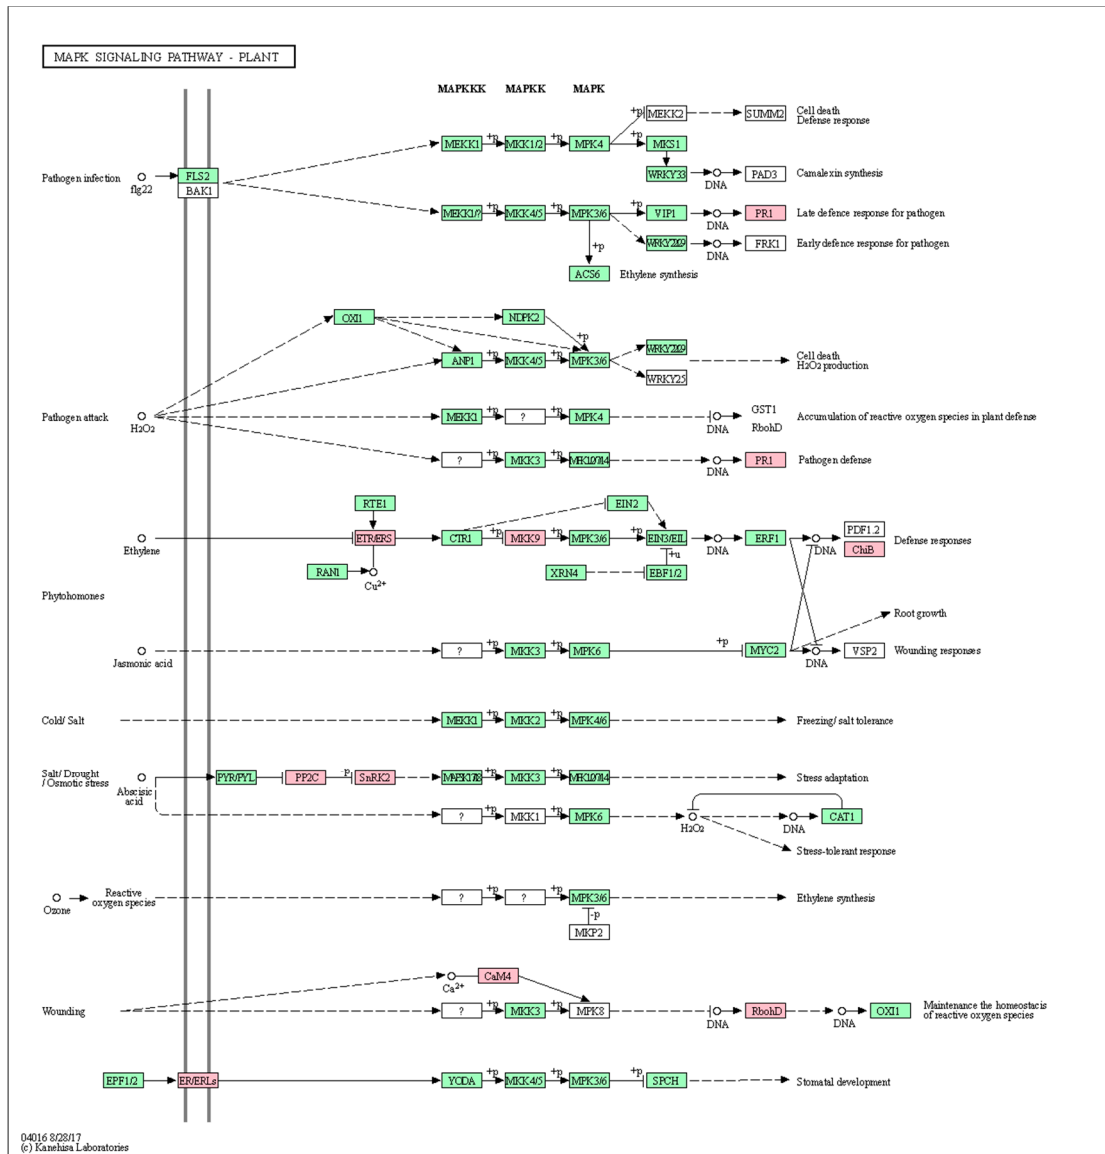

Figure S2 KEGG Mapper of the MAPK signalling pathway

Note: Pink gene selected by MAPK  $\log_2 > |1|$  in the transcriptome.

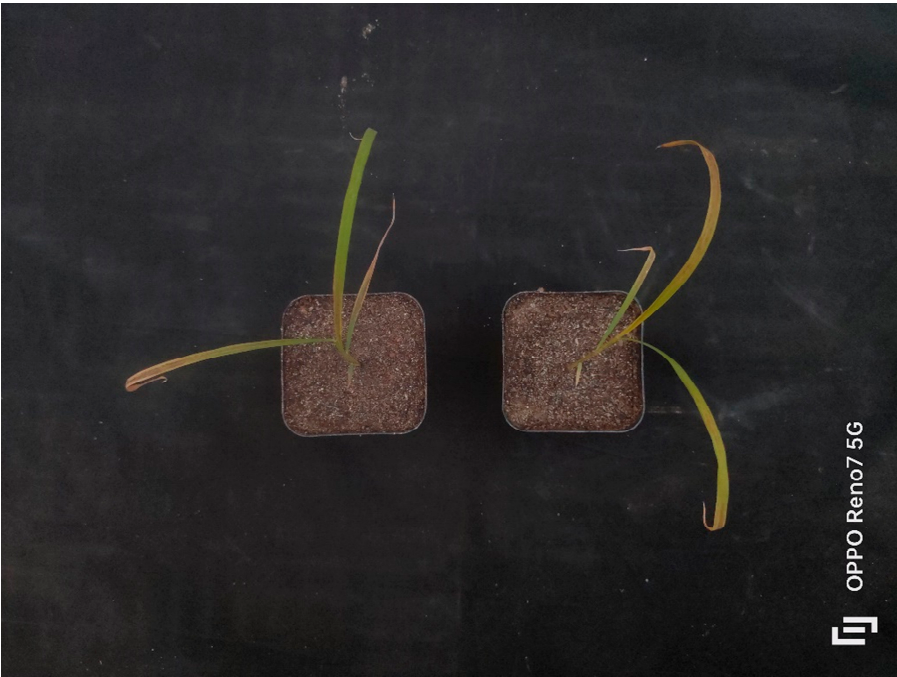

Figure S3 Comparison of herbicide damaged phenotype treated by imazethapyr and imazamox in HRT1.  
Note: left is imazethapyr, right is imazamox

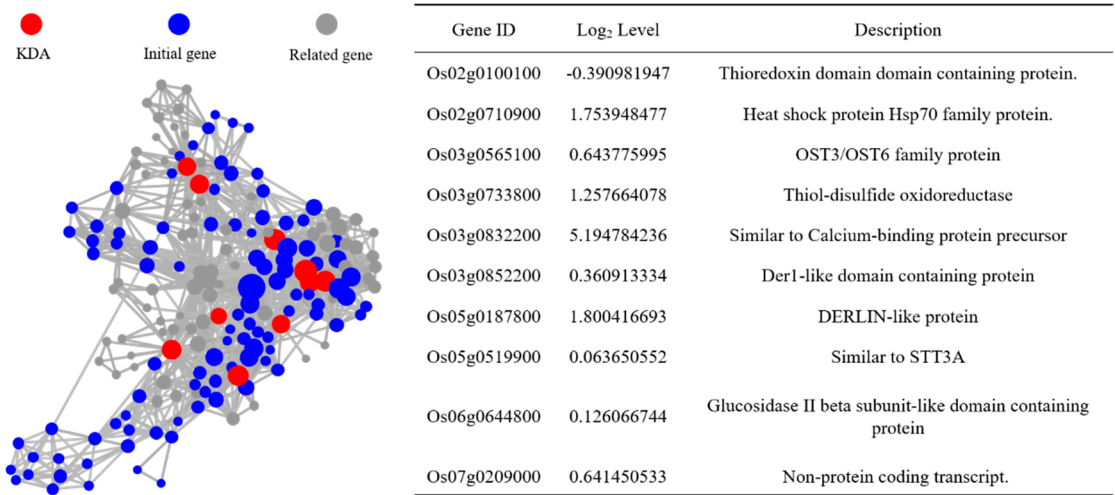

Figure S4 Analysis of key driver genes in the pathway of endoplasmic reticulum stress

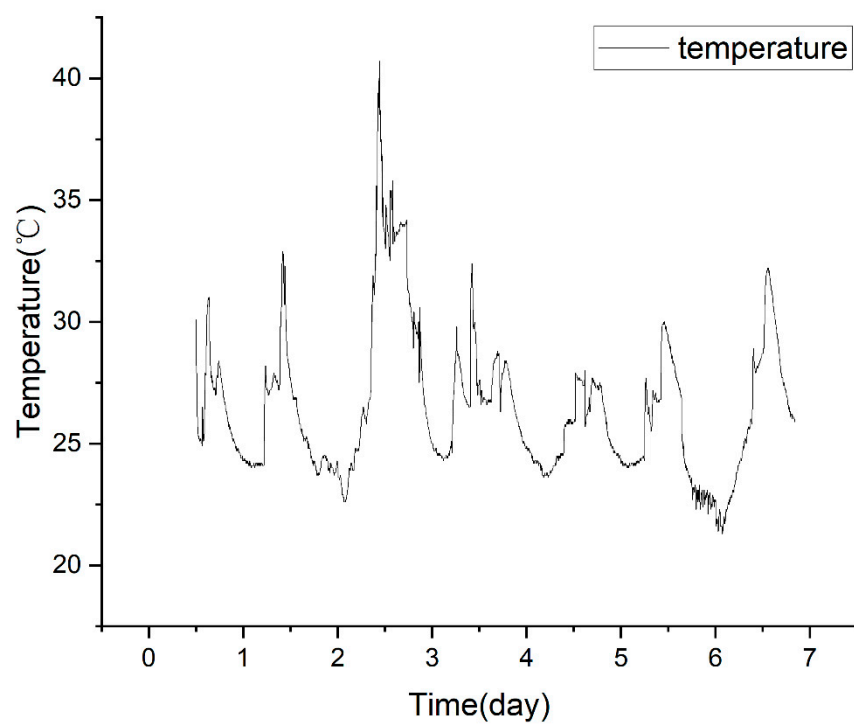

Figure S5 Temperature changes in the greenhouse used for the experiments.
